# Supplementary material for: Endothelial caveolin-1 regulates cerebral thrombo-inflammation in acute ischemia/reperfusion injury
Source: PubMed Central journal article supplement — eBioMedicine. 2022 Sep 21;84:104275. doi: 10.1016/j.ebiom.2022.104275 (PMC9508414; doi:10.1016/j.ebiom.2022.104275), 2022-09-21

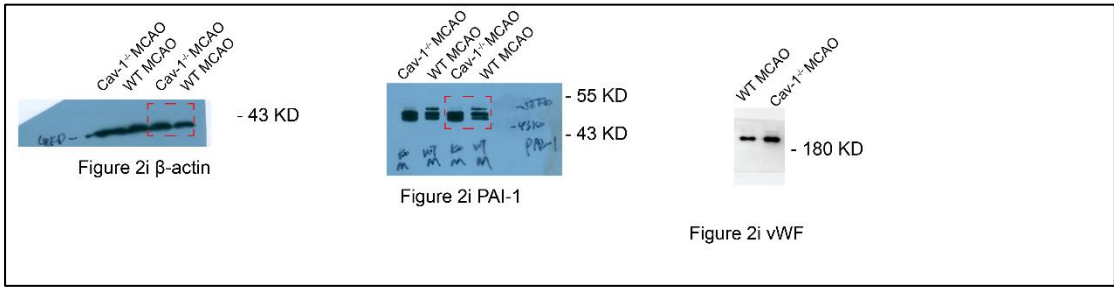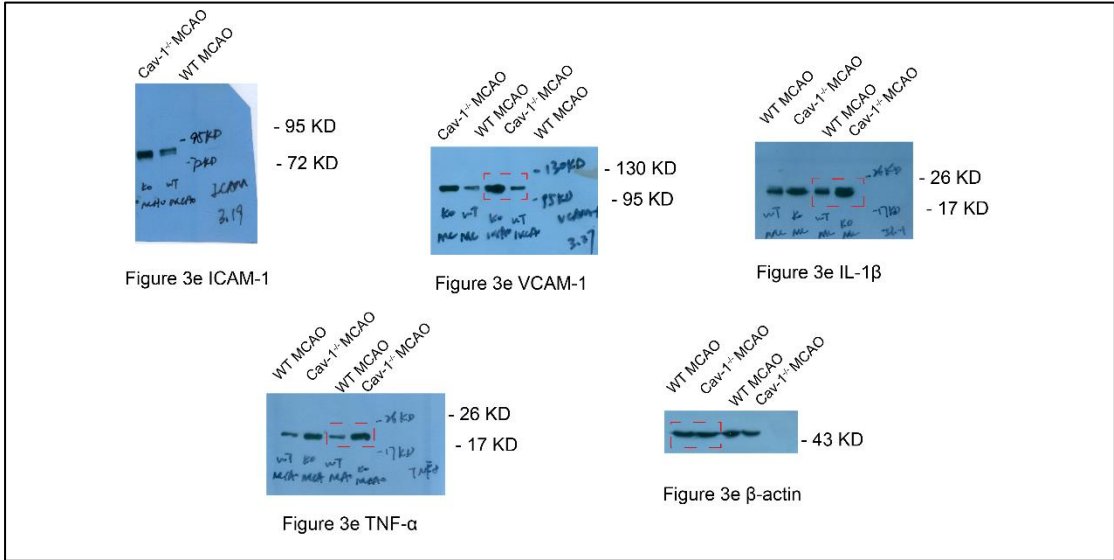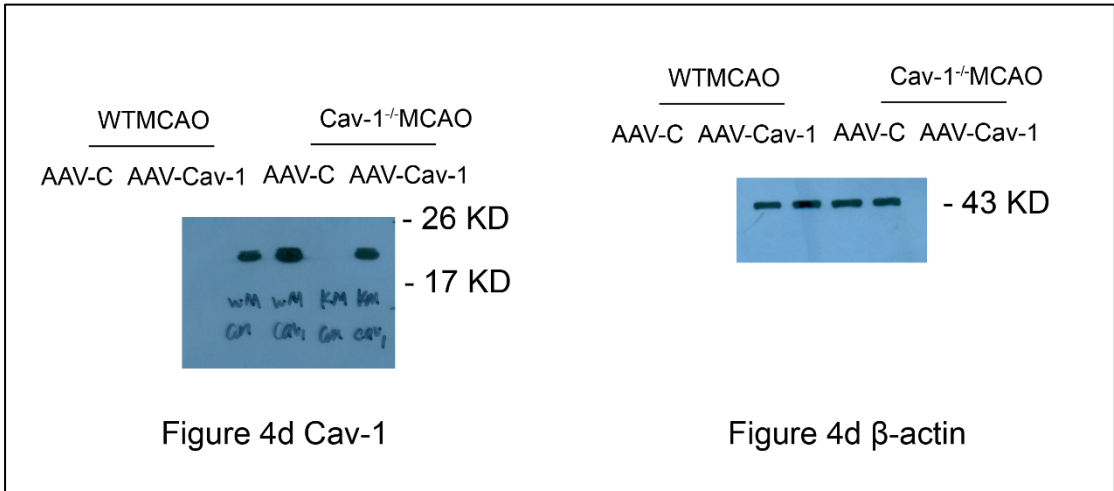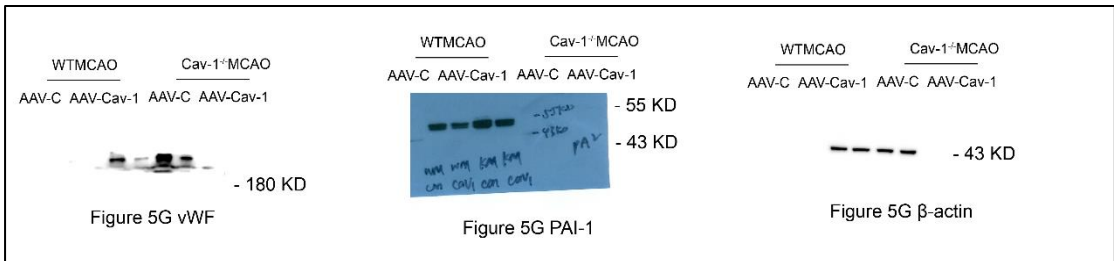

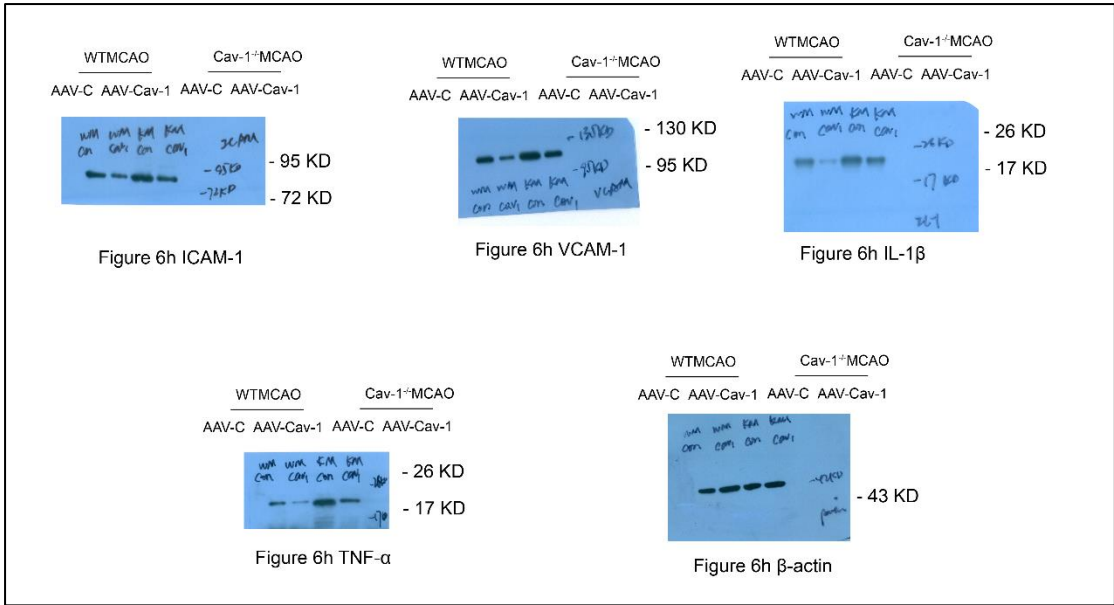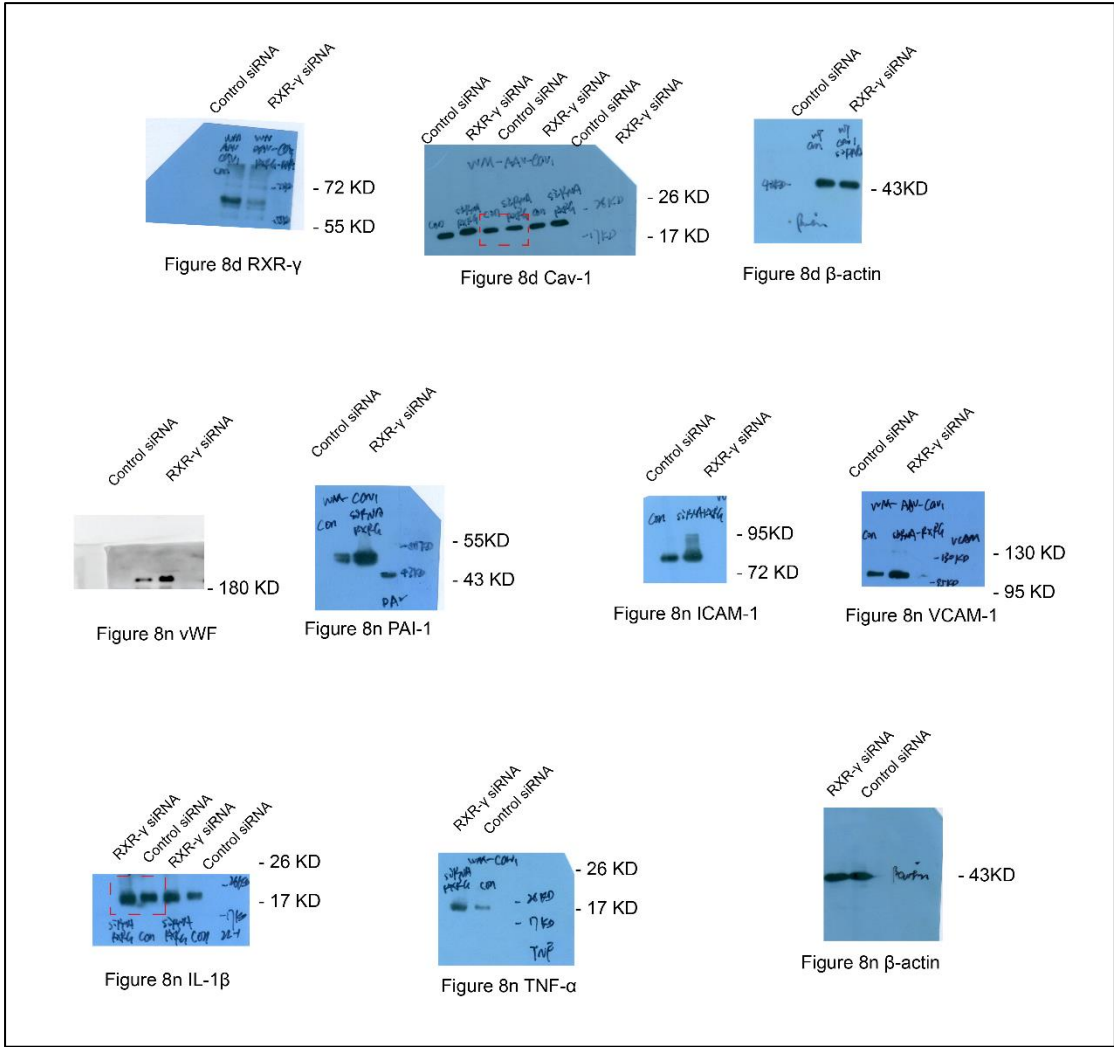

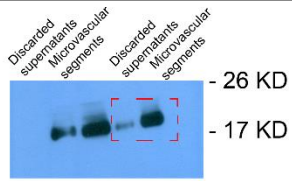

Figure S1h Claudin-5

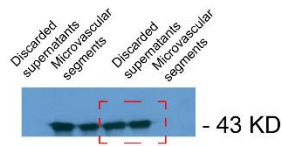

Figure S1h  $\beta$ -actin

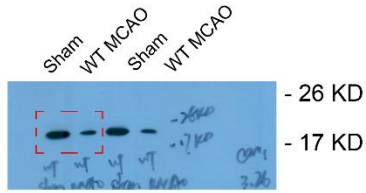

Figure S1j Cav-1

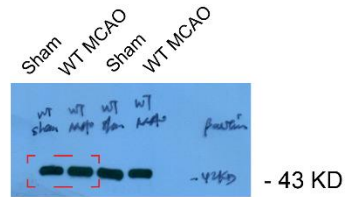

Figure S1j  $\beta$ -actin

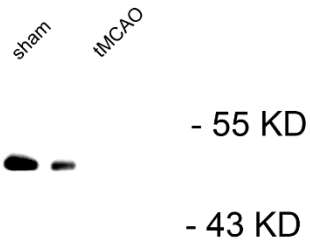

Figure S2c PTFR

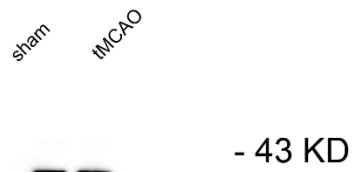

Figure S2c  $\beta$ -actin

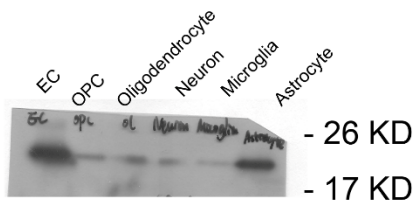

Figure S3b Cav-1

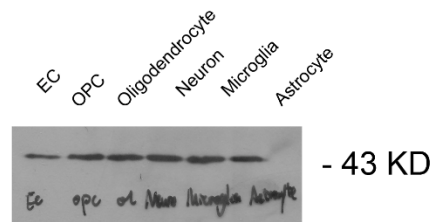

Figure S3b  $\beta$ -actin

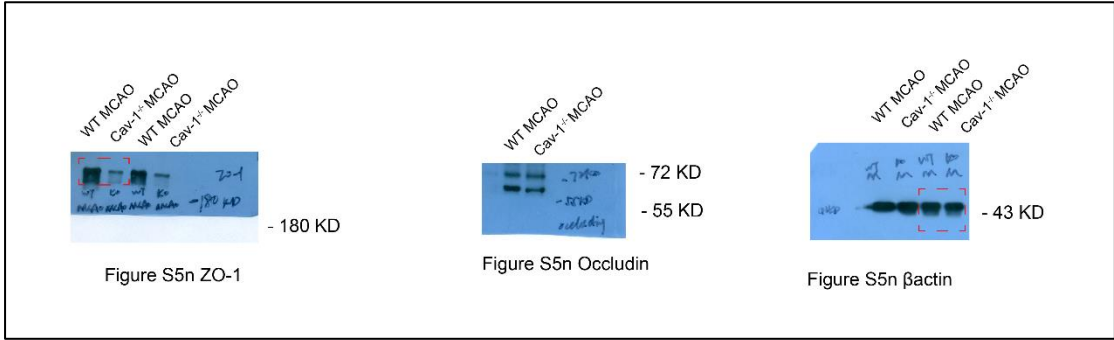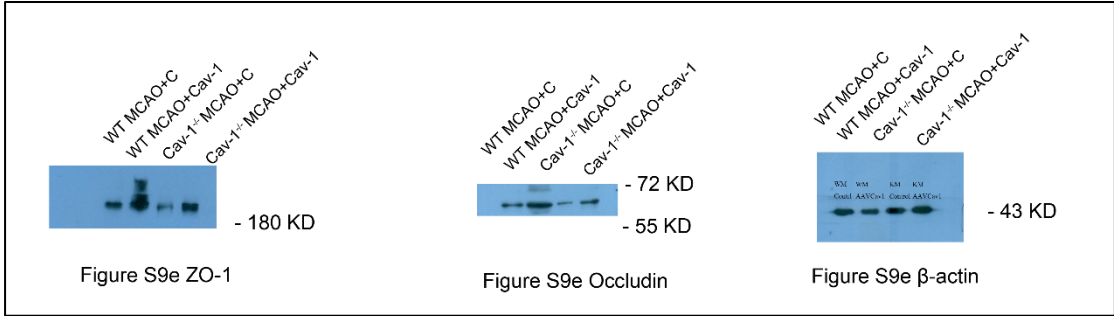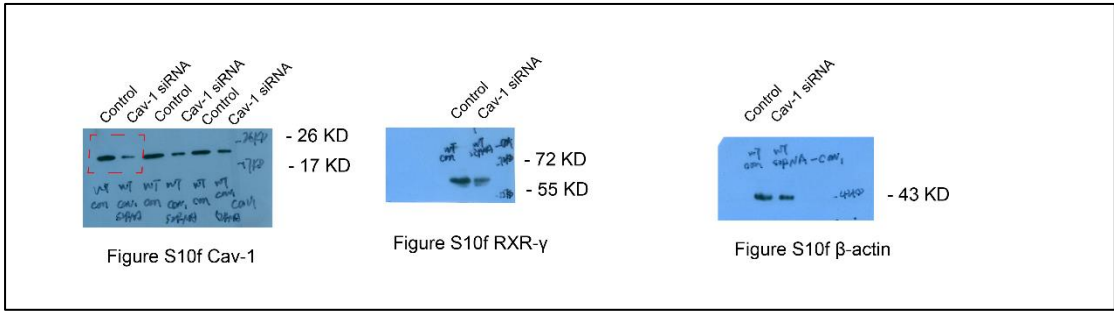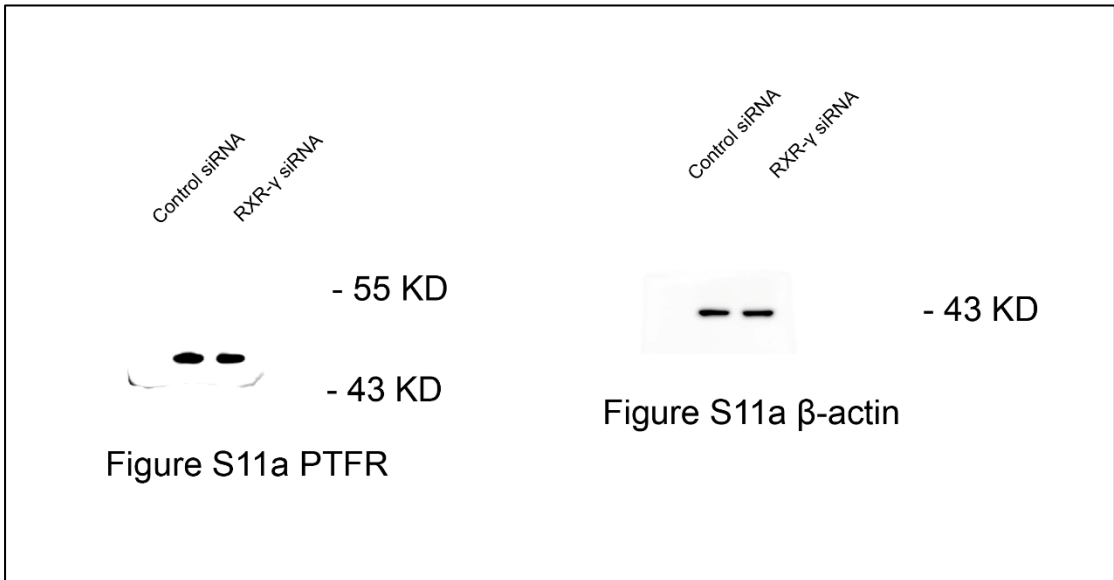

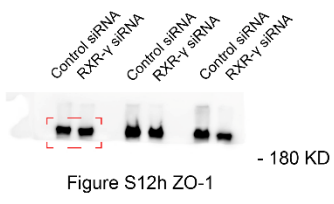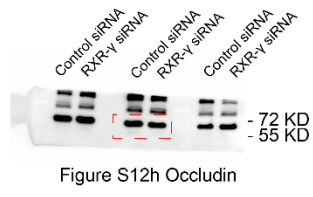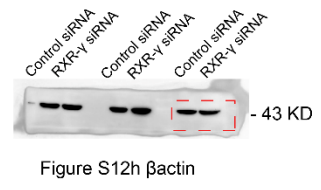

Supplement: mmc3.pdf [file mmc3.pdf]
