# Supplementary material for: Endothelial caveolin-1 regulates cerebral thrombo-inflammation in acute ischemia/reperfusion injury
Source: PubMed Central journal article supplement — eBioMedicine. 2022 Sep 21;84:104275. doi: 10.1016/j.ebiom.2022.104275 (PMC9508414; doi:10.1016/j.ebiom.2022.104275), 2022-09-21
Supplement: mmc2.pdf [file mmc2.pdf]

Supplementary Materials for

**Endothelial caveolin-1 regulates cerebral thrombo-inflammation in acute  
ischemia/reperfusion injury**

Xiaohao Zhang<sup>1,2,3†</sup>, Pengyu Gong<sup>4†</sup>, Ying Zhao<sup>1†</sup>, Ting Wan<sup>1</sup>, Kang Yuan<sup>1</sup>,  
Yunyun Xiong<sup>5,6,7</sup>, Min Wu<sup>8</sup>, Mingming Zha<sup>1</sup>, Yunzi Li<sup>1</sup>, Teng Jiang<sup>2</sup>, Xinfeng Liu<sup>1</sup>,  
Ruidong Ye<sup>1</sup>, Yi Xie<sup>1\*</sup>, Gelin Xu<sup>1\*</sup>

†Contributed equally.

\*Corresponding author. E-mail: xy\_307@126.com (Y.X.) or gelinxu@nju.edu.cn (G.X.)

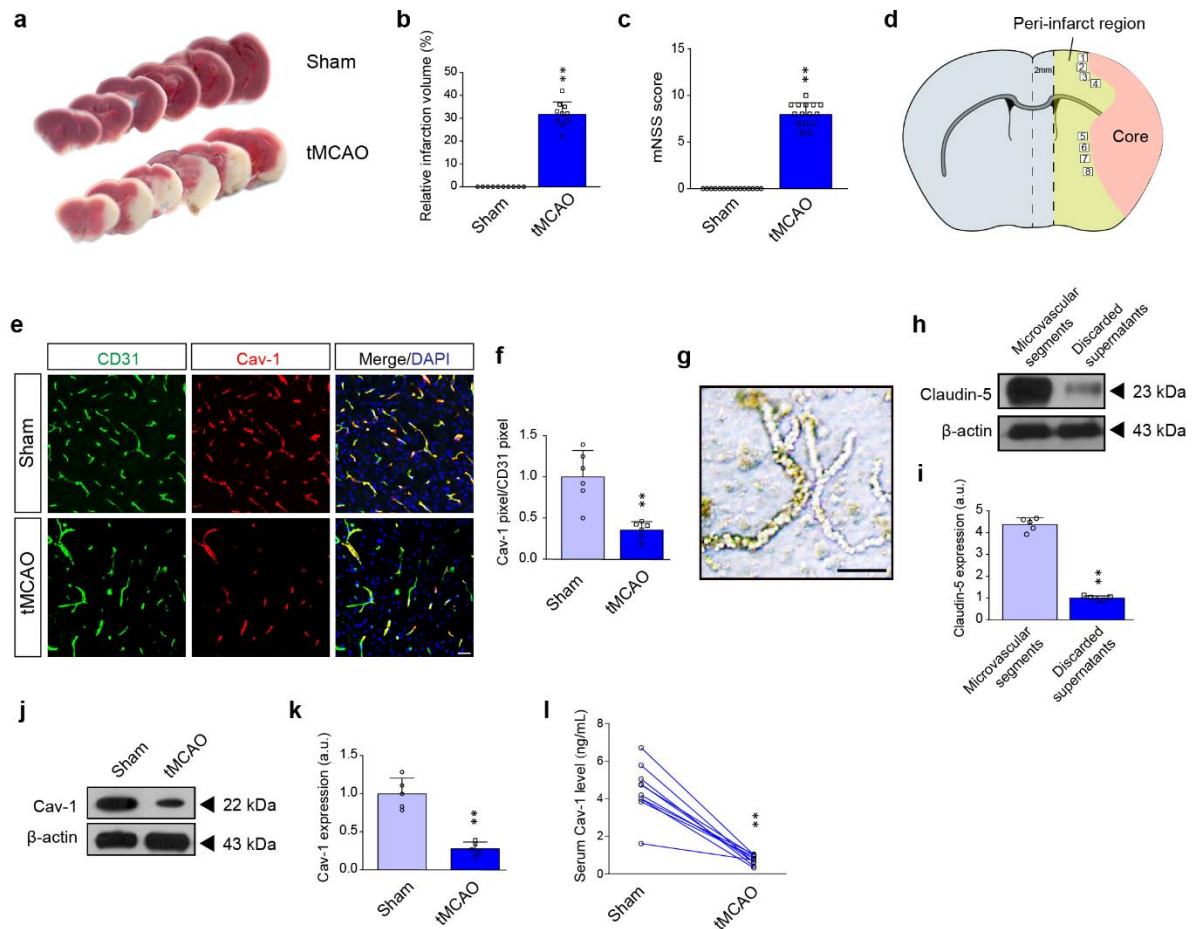

### Supplemental Figure 1. Endothelial and serum Cav-1 levels are decreased at tMCAO-24h.

(a) Representative images of coronal brain sections stained with TTC [quantified in (b)];  $n = 10$  in each group; mean  $\pm$  S.D.;  $**P < 0.01$  vs. sham by unpaired t-test). (c) The mNSS score of sham and tMCAO mice 24 h after surgery ( $n = 15$  in each group; mean  $\pm$  S.D.;  $**P < 0.01$  vs. sham by unpaired t-test). (d) Schematic map showing eight fields in the peri-infarct region for immunostaining image acquisition in every sample. (e, f) Representative immunostaining images and quantification showing the expression of Cav-1 in endothelial cells (CD31<sup>+</sup>) ( $n = 6$  in each group; mean  $\pm$  S.D.;  $**P < 0.01$  vs. sham by unpaired t-test). (g) Representative light microscopic image of isolated brain microvessels from the peri-infarct area. (h, i) Immunoblotting and quantification showing the expression of endothelial-specific marker Claudin-5 in the isolated microvessels from the peri-infarct tissue 24h after surgery (a pool of 2 mice per sample;  $n = 5$  samples per group; mean  $\pm$  S.D.;  $**P < 0.01$  vs. microvascular segments by unpaired t-test). (j, k) Immunoblotting and quantification showing the Cav-1 expression in isolated brain microvessels from the peri-infarct tissue (a pool of 2 mice per sample;  $n = 5$  samples per group;  $**P < 0.01$  vs. sham by unpaired t-test). (l) Serum level of Cav-1 in sham and tMCAO mice ( $n = 8$ ; mean  $\pm$  S.D.;  $**P < 0.01$  vs. sham by unpaired t-test). Scale bar: 20  $\mu$ m.

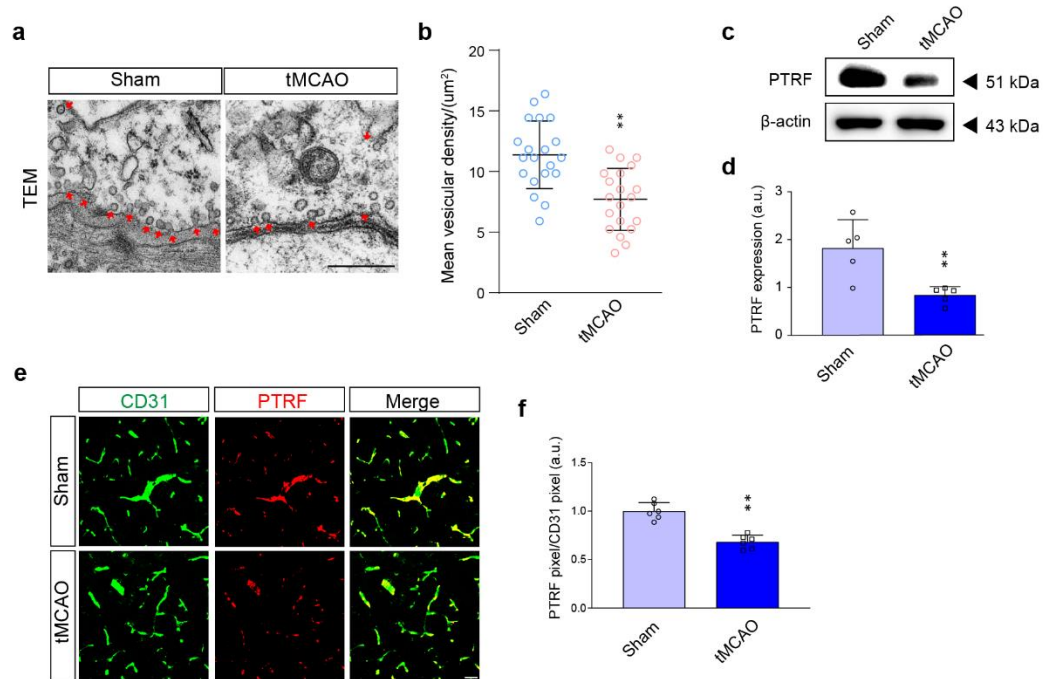

**Supplemental Figure 2. Arteriole caveolae are reduced at the peri-infarct region at tMCAO-24h.**

(a) TEM images showing the alteration of arteriole caveolae (red arrows) [quantified in (b); n = 5 mice, 20 arterioles in each group; mean ± S.D; \*\**P* < 0.01 vs. sham by unpaired t-test]. (c, d) Immunoblotting and quantification showing the expression of PTRF in isolated brain microvessels from the peri-infarct tissue (a pool of 2 mice per sample; n = 5 samples per group; \*\**P* < 0.01 vs. sham by unpaired t-test). (e, f) Representative immunostaining images and qualification showing the expression of PTRF in the endothelium (CD31<sup>+</sup>) (n = 6 in each group; mean ± S.D; \*\**P* < 0.01 vs. sham by unpaired t-test). Scale bar: 500 nm in (a) and 20 µm in (e).

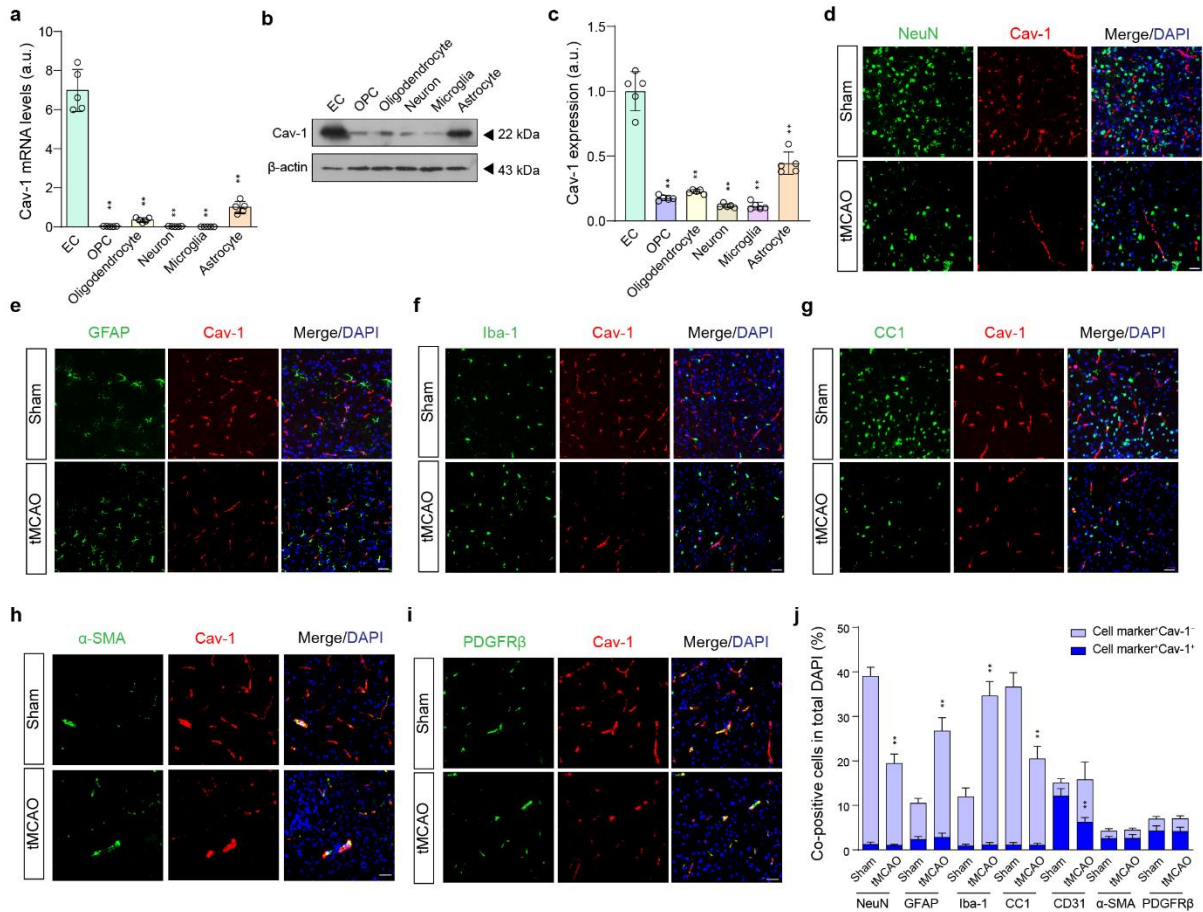

### Supplemental Figure 3. The cell-type specificity of Cav-1 expression under physiological and pathological conditions.

(a–c) Cav-1 mRNA and protein levels in primary cultured endothelium, OPC, oligodendrocyte, neuron, microglia, and astrocyte *in vitro* (n = 5 experiments; mean ± S.D; \*\*P < 0.01 vs. endothelium by one-way ANOVA with Tukey post hoc test). (d–i) Double immunostaining of Cav-1 with NeuN (neuron marker), GFAP (astrocyte marker), Iba-1 (microglia marker), CC1 (mature oligodendrocyte marker), α-SMA (vascular smooth muscle cell marker), and PDGFRβ (pericytes marker) at the peri-infarct region 24 h after tMCAO [quantified in (j); n = 6 in each group; mean ± S.D; \*\*P < 0.01 vs. sham by unpaired t-test]. Scale bar, 20 μm.

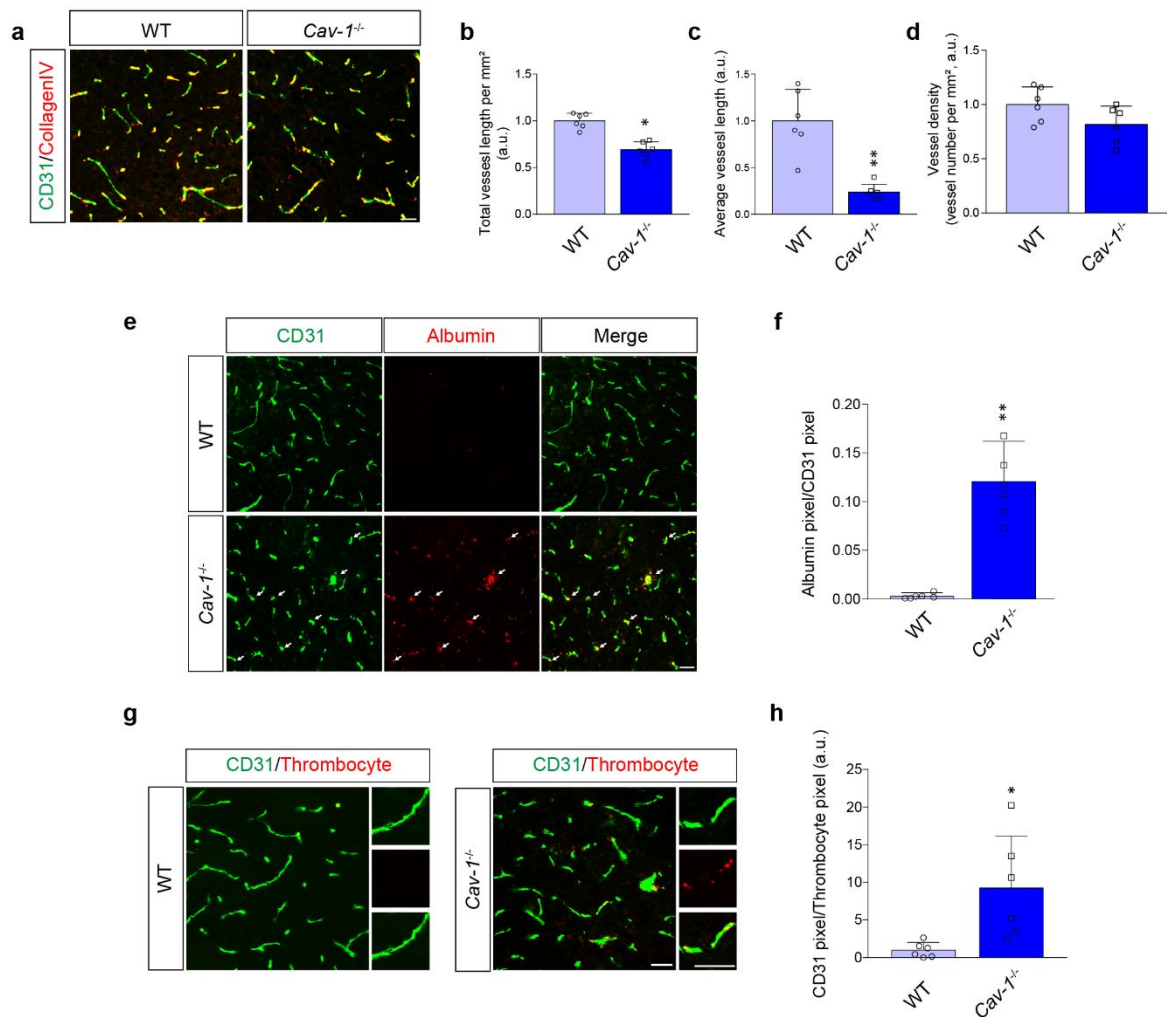

**Supplemental Figure 4. Cav-1 deletion induces endothelial pathological changes.**

(a) Representative images of microvessels (CD31<sup>+</sup>, green; Collagen IV<sup>+</sup>, red) [quantified in (b–d); n = 6 in each group; mean ± S.D; \**P* < 0.05, \*\**P* < 0.01 vs. WT mice by unpaired t-test]. (e, f) Immunofluorescent images and quantification showing the albumin leakage (red) around CD31<sup>+</sup> (green) vessels (n = 6 in each group; mean ± S.D; \*\**P* < 0.05 vs. WT mice by unpaired t-test). (g, h) Representative images and quantification showing thrombocytes (red) in the cerebral microvessels (CD31<sup>+</sup>, green) (n = 6 in each group; mean ± S.D; \**P* < 0.05 vs. WT mice by unpaired t-test). Scale bar: 20 μm.



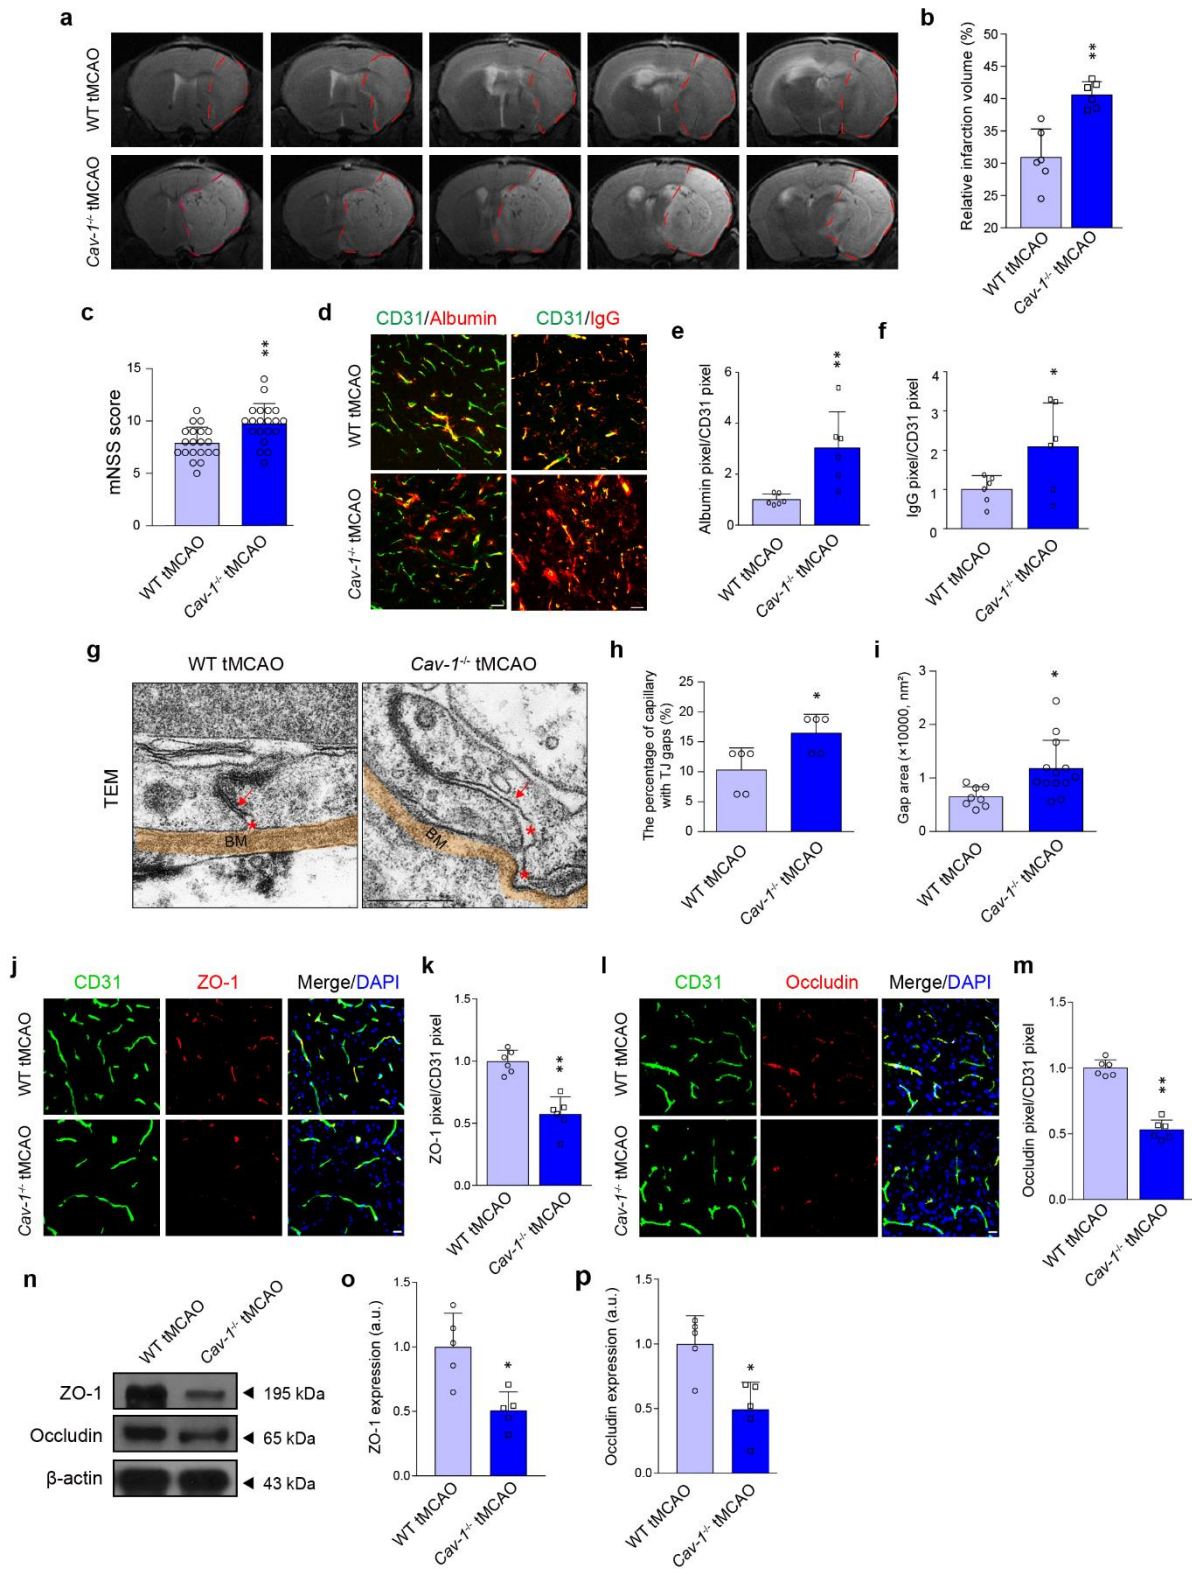

### Supplemental Figure 5. Cav-1 deficiency increases the microvascular permeability in tMCAO-24h.

(a) Representative images of 5 coronal brain sections in T2 MRI scans of WT tMCAO mice and Cav-1<sup>-/-</sup> tMCAO mice [quantified in (b); n = 6 in each group; mean ± S.D.; \*\*P < 0.01 vs. WT tMCAO mice by unpaired t-test]. (c) The mNSS score of tMCAO mice of two genotypes 24 h after surgery (n = 20 in each group; mean ± S.D.; \*\*P < 0.01 vs. WT tMCAO mice by unpaired t-test). (d–f) Immunofluorescence staining and quantification showing the albumin (red) and IgG leakage (red) around vessels (CD31<sup>+</sup>,

green) at the peri-infarct area 24 h after tMCAO (n = 6 in each group; mean  $\pm$  S.D; \**P* < 0.05; \*\**P* < 0.01 vs. WT tMCAO mice by unpaired t-test). (g) TEM images showing endothelial TJ gaps in the peri-infarct area from WT tMCAO and *Cav-1*<sup>-/-</sup> MCAO mice 24 h after surgery [quantified in (h, i); n = 5 mice in each group. Sixteen capillaries were randomly chosen in each mouse; mean  $\pm$  S.D; \**P* < 0.05 vs. WT tMCAO mice by unpaired t-test]. The red arrows indicate gaps between endothelial cells. The red asterisks indicate gaps between endothelial cells and basal membrane. (j, i) Immunofluorescence staining showing the expression of ZO-1 (red) and occludin (red) in the vessels (CD31<sup>+</sup>, green) at the peri-infarct area [quantified in (k, m); n = 6 in each group; mean  $\pm$  S.D; \*\**P* < 0.01 vs. WT tMCAO mice by unpaired t-test]. (n–p) Immunoblotting and quantitative analysis of TJ protein 24 h after surgery (a pool of 2 mice per sample; n = 5 samples per group; \**P* < 0.05 vs. WT tMCAO mice by unpaired t-test). Scale bar: 500 nm in (g) and 20  $\mu$ m in others. BM, basal membrane.

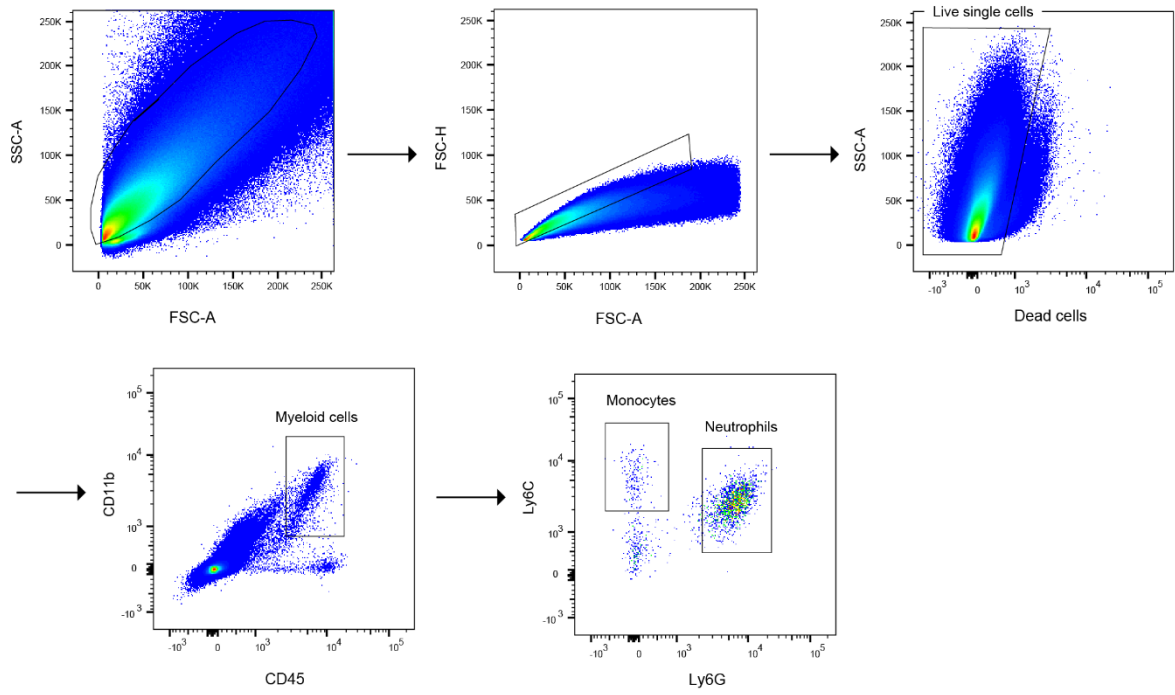

**Supplemental Figure 6. Gating strategies for flow cytometry to evaluate myeloid cell infiltration in the ischemic hemisphere at tMCAO-24h.**



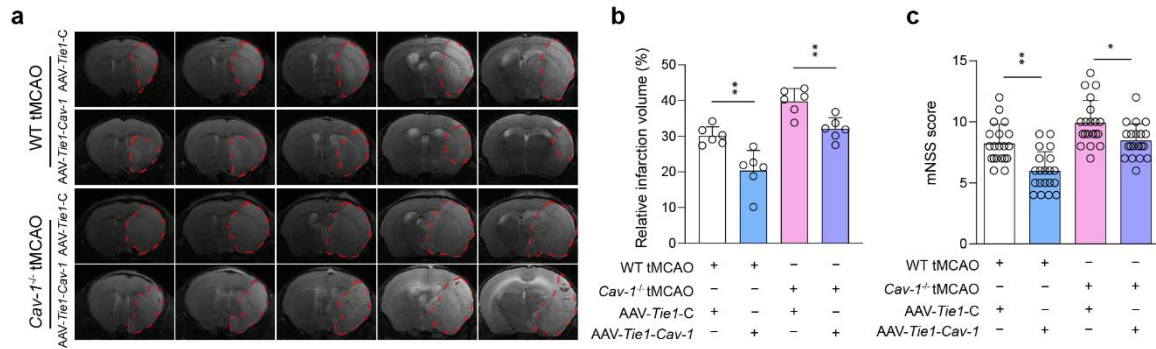

**Supplemental Figure 7. AAV-Tie1-Cav-1 decreases the infarct volume and mNSS score at tMCAO-24h.**

(a) Representative images of 5 coronal brain sections in T2 MRI scans of wild-type tMCAO and Cav-1<sup>-/-</sup> tMCAO mice transfected with AAV-Tie1-C or AAV-Tie1-Cav-1 [quantified in (b); n = 6 in each group; mean ± S.D; \*\*P < 0.01 vs. AAV-Tie1-C-transfected mice by one-way ANOVA with Tukey post hoc test]. (c) The mNSS score of wild-type tMCAO and Cav-1<sup>-/-</sup> tMCAO mice transfected with AAV-Tie1-C or AAV-Tie1-Cav-1 (n = 20 in each group; mean ± S.D; \*P < 0.05; \*\*P < 0.01 vs. AAV-Tie1-C-transfected mice by one-way ANOVA with Tukey post hoc test).

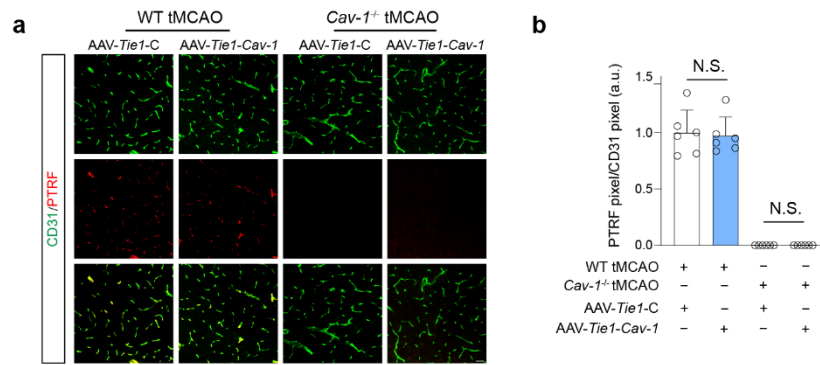

**Supplemental Figure 8. AAV-*Tie1*-*Cav-1* does not affect the PTRF level.**

(a, b) Representative fluorescent images and qualification of PTRF (red) in microvessels (CD31<sup>+</sup>, green) at the peri-infarct tissue 24 h after tMCAO (n = 6 in each group; mean ± S.D; one-way ANOVA with Tukey post hoc test). Scale bar: 20 μm.

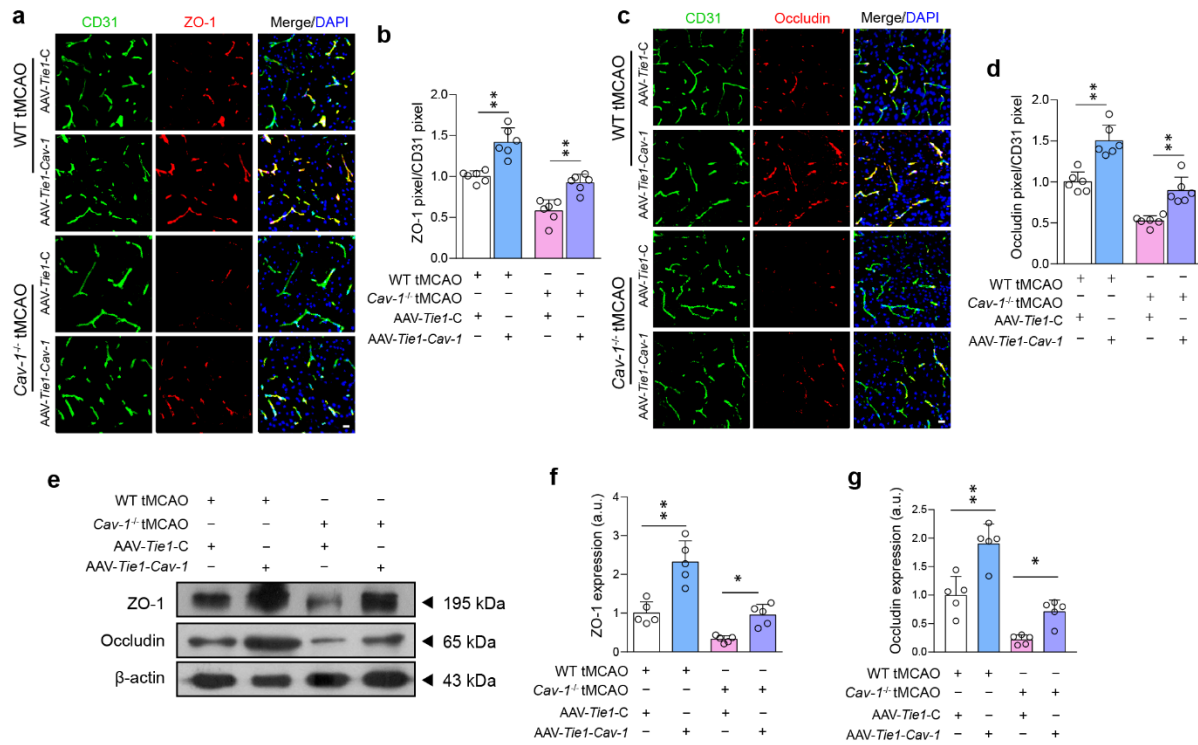

**Supplemental Figure 9. AAV-Tie1-Cav-1 increases TJ protein expression at tMCAO-24h.**

(a, c) Immunofluorescence staining showing the expression of ZO-1 (red) and occludin (red) in the vessels (CD31<sup>+</sup>, green) at the peri-infarct area 24 h after tMCAO [quantified in (b, d); n = 6 in each group; mean ± S.D; \*\*P < 0.01 vs. AAV-Tie1-C-transfected mice by one-way ANOVA with Tukey post hoc test]. (e–g) Quantitative analysis for immunoblotting of TJ proteins 24 h after tMCAO (a pool of 2 mice per sample; n = 5 samples per group; \*P < 0.05; \*\*P < 0.01 vs. AAV-Tie1-C-transfected mice by one-way ANOVA with Tukey post hoc test). Scale bar: 20 μm.

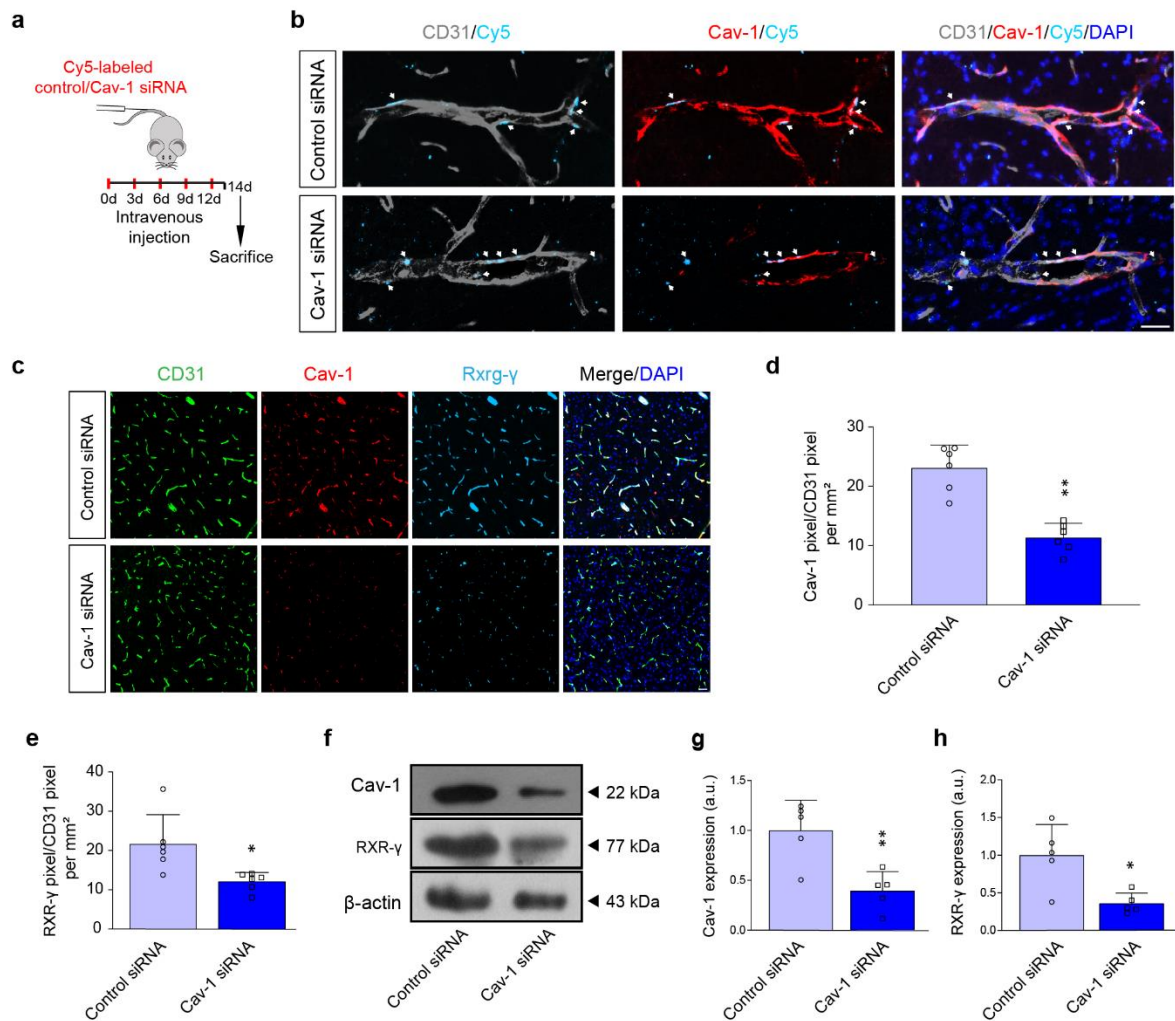

**Supplemental Figure 10. Cav-1 siRNA suppresses endothelial Cav-1 as well as RXR- $\gamma$  expression at tMCAO-24h.**

(a) Experimental flow chart. (b) Representative immunofluorescence staining showing the co-localization of siRNA (cyan), Cav-1 (red) and CD31 (gray) in siRNA-injected WT Sham mice ( $n = 6$  in each group). (c) Representative images of immunofluorescence staining for Cav-1 (red) or RXR- $\gamma$  (cyan) in the cerebral microvessels (CD31<sup>+</sup>, green) [quantified in (d, e);  $n = 6$  in each group; mean  $\pm$  S.D.; \* $P < 0.05$ ; \*\* $P < 0.01$  vs. control siRNA-injected mice by unpaired t-test]. (f–h) Immunoblotting and quantification displaying the expression of Cav-1 and RXR- $\gamma$  in brain microvascular segments from the 2 groups (a pool of 2 mice per sample;  $n = 5$  samples per group; mean  $\pm$  S.D.; \* $P < 0.05$ ; \*\* $P < 0.01$  vs. control siRNA-injected mice by unpaired t-test). Scale bar: 20  $\mu$ m.

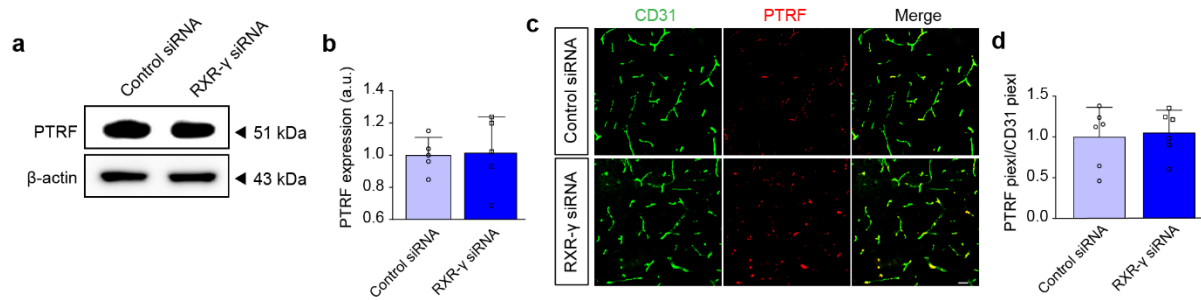

**Supplemental Figure 11. Knockdown of RXR- $\gamma$  does not change the level of caveolae.**

**(a, b)** Quantitative analysis for immunoblotting of PTRF (a pool of 2 mice per sample;  $n = 5$  samples per group; mean  $\pm$  S.D; unpaired t-test). **(c)** Representative images of immunofluorescence staining of PTRF (red) in the cerebral microvessels (CD31<sup>+</sup>, green) [quantified in **(d)**];  $n = 6$  in each group; mean  $\pm$  S.D; unpaired t-test]. Scale bar: 20  $\mu$ m.

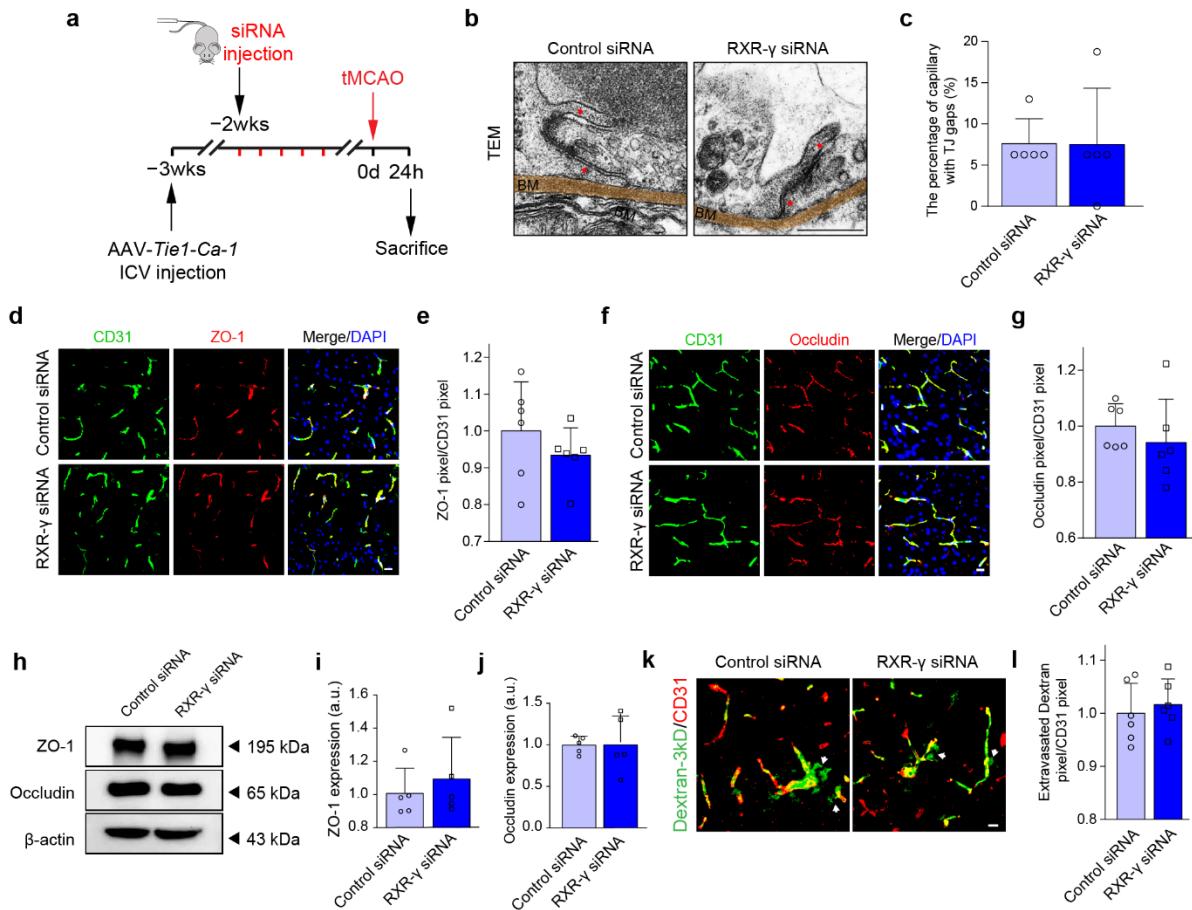

**Supplemental Figure 12. Knockdown of RXR- $\gamma$  did not affect TJ integrity and BBB leakage under Cav-1 overexpression.**

(a) Experimental flow chart. (b, c) TEM images and quantification showing TJ gaps (red arrows) in the peri-infarct area 24h after tMCAO ( $n = 5$  mice in each group. Sixteen capillaries were randomly chosen in each mouse; mean  $\pm$  S.D; unpaired t-test). The red arrows indicate gaps between endothelial cells. (d–g) Immunofluorescence staining and quantifications showing the expression of ZO-1 (red) and occludin (red) in the CD31<sup>+</sup> vessels (green) ( $n = 6$  in each group; mean  $\pm$  S.D; unpaired t-test). (h–j) Immunoblotting and quantitative analysis of TJ proteins in microvascular segments (a pool of 2 mice per sample;  $n = 5$  samples per group; unpaired t-test). (k, l) Representative images of immunofluorescence staining and quantification of extravasated FITC-dextran (3 kDa; white arrows) from CD31<sup>+</sup> microvessels (red) ( $n = 6$  mice in each group; mean  $\pm$  S.D; unpaired t-test). Scale bar: 500 nm in (b) and 20  $\mu$ m in others. BM, basal membrane.



**Table S1. Real-time PCR primers in this study.**

| <b>Primer name</b> | <b>Primer sequence</b> |                       |
|--------------------|------------------------|-----------------------|
| Cav-1              | Forward                | GAAGGGACACACAGTTTCG   |
|                    | Reverse                | AGGAAGGAGAGAATGGCAA   |
| Spdef              | Forward                | GGCTCAACAAGGAGAAAGG   |
|                    | Reverse                | TGTAATACTGGCGGATGGA   |
| Gpr65              | Forward                | TGGCAGATAAACCTCAAC    |
|                    | Reverse                | AGCATAGGACGAAAGTCA    |
| Itih4              | Forward                | TATTACCTTGCCGCTTCC    |
|                    | Reverse                | CATACTTACCAGTCACCTCCA |
| Sis                | Forward                | CACTGAGCAGAATCCCTT    |
|                    | Reverse                | TGATGTGGCACTTCGTAT    |
| Fgf21              | Forward                | CACCGCAGTCCAGAAAGT    |
|                    | Reverse                | TGGCTGTTGGCAAAGAAA    |
| Slc17a9            | Forward                | TGCCCTGGAGACAACCTAT   |
|                    | Reverse                | TGATGACTCTGTAACCCTGAC |
| Slc15a1            | Forward                | AGCGGCTACCAGTTCTTC    |
|                    | Reverse                | TGTTGGGTGGGATGTCTT    |
| Lcn2               | Forward                | AAGGCAGCTTTACGATGT    |
|                    | Reverse                | TGGTTGTAGTCCGTGGTG    |
| Rxrg               | Forward                | CGTGCTGTTTAACCCAGAT   |
|                    | Reverse                | AGGTGTTCCAGGCATTTTC   |
| Ido1               | Forward                | AGGATGCGTGACTTTGTG    |
|                    | Reverse                | TCTGGAAGATGCTGCTCT    |
| Adra2b             | Forward                | CGTGCGTGGTGGGAGGTCTA  |
|                    | Reverse                | TTGATGCGGCGTGGAGTGC   |
| GAPDH              | Forward                | AAGAAGGTGGTGAAGCAGG   |
|                    | Reverse                | GAAGGTGGAAGAGTGGGAGT  |

**Table S2. Comparison of baseline data according to patients with and without ENI.**

| Variables                              | All patients, n = 270 | With ENI, n = 100    | Without ENI, n = 170 | P value |
|----------------------------------------|-----------------------|----------------------|----------------------|---------|
| Demographic characteristics            |                       |                      |                      |         |
| Age, years                             | 68.4 ± 12.4           | 66.7 ± 12.9          | 69.2 ± 12.2          | 0.099   |
| Male, n (%)                            | 171 (63.3)            | 68 (68.0)            | 103 (60.6)           | 0.222   |
| Clinical data                          |                       |                      |                      |         |
| Hypertension                           | 190 (70.4)            | 69 (69.0)            | 121 (71.2)           | 0.705   |
| Diabetes mellitus                      | 65 (24.1)             | 15 (15.0)            | 50 (29.4)            | 0.007   |
| Hyperlipidemia                         | 30 (11.1)             | 6 (6.0)              | 24 (4.1)             | 0.040   |
| Systolic blood pressure, mmHg          | 137.2 ± 23.5          | 137.6 ± 24.9         | 136.5 ± 22.6         | 0.697   |
| Diastolic blood pressure, mmHg         | 82.2 ± 14.7           | 81.6 ± 14.6          | 82.5 ± 14.7          | 0.622   |
| Time from onset to recanalization, min | 357.5 (251.0, 540.0)  | 351.0 (231.0, 532.5) | 360.0 (270.0, 541.5) | 0.312   |
| Baseline NIHSS, score                  | 13.0 (10.0, 16.0)     | 13.0 (11.0, 17.0)    | 12.0 (8.0, 16.5)     | 0.023   |
| Baseline ASPECTS, score                | 9.0 (8.0, 9.0)        | 9.0 (8.0, 9.0)       | 8.0 (8.0, 9.0)       | 0.001   |
| Prior intravenous thrombolysis, n (%)  | 119 (44.1)            | 48 (48.0)            | 71 (41.8)            | 0.319   |
| Poor collateral status, n (%)          | 134 (49.6)            | 47 (47.0)            | 87 (51.2)            | 0.507   |
| Caveolin-1 levels, ng/mL               | 0.191 (0.109, 0.298)  | 0.201 (0.136, 0.327) | 0.178 (0.088, 0.278) | 0.028   |

Abbreviations: ASPECTS, the Alberta Stroke Program Early Computed Tomography Score; NIHSS, National Institute of Health Stroke Scale.

**Table S3. Physiological parameters and tMCAO-24h mortality in WT and Cav-1<sup>-/-</sup> mice.**

| <b>Variables</b>        | <b>WT mice</b> | <b>Cav-1<sup>-/-</sup> mice</b> | <b>P value</b> |
|-------------------------|----------------|---------------------------------|----------------|
| Weight, g               | 23.5 ± 0.9     | 23.8 ± 0.5                      | 0.375          |
| BP, mmHg                | 104.5 ± 5.6    | 106.2 ± 5.0                     | 0.599          |
| pH                      | 7.38 ± 0.05    | 7.38 ± 0.03                     | 0.846          |
| Pco <sub>2</sub> , mmHg | 39.3 ± 2.2     | 39.8 ± 1.2                      | 0.629          |
| Po <sub>2</sub> , mmHg  | 98.7 ± 2.7     | 99.2 ± 1.7                      | 0.712          |
| Bleeding time, s        | 55.2 ± 8.3     | 49.0 ± 10.5                     | 0.285          |
| tMCAO-24h mortality, %* | 8.6            | 17.1                            | 0.284          |

Values presented as Mean ± S.D. n = 6 mice in each group. \* n = 35 in each group for calculating the mortality.
